# Supplementary material
Source: PubMed Central journal article supplement (PMC7790886)
Supplement: NIHMS1642803-supplement-3.pdf [file NIHMS1642803-supplement-3.pdf]

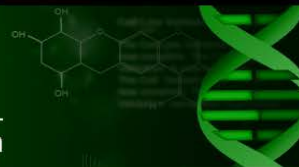

### Cytogenetics and Cell Authentication core

CCAC database is a comprehensive databases of short tandem repeat (STR) profiles, The database includes profiles from 20 public database/ publications and the cell lines developed by MD Anderson research labs. The database contains over 4500 unique human cancer cell line STR profiles, one of the largest cancer cell line STR online search database in the world

For questions please contact Xuesong Li (713)-792-6833, Xsli@mdanderson.org

Annual cell line authentication is required by  
UTMDACC INSTITUTIONAL POLICY # ACA1044

|         |            |
|---------|------------|
| SET 507 | 11/18/2019 |
|---------|------------|

Expiration date: 11/18/2020

| Source              | Sample Name | AMEL | CSF1PO | D13S317 | D16S539 | D18S51 | D21S11 | D3S1358 | D5S818 | D7S820 | D8S1179 | FGA      | TH01 | TPOX | vWA   | Comments |
|---------------------|-------------|------|--------|---------|---------|--------|--------|---------|--------|--------|---------|----------|------|------|-------|----------|
| Balkees Abderrahman | MCF-7-2A    | X    | 10     | 11      | 11,12   | 14     | 30     | 15,16   | 12     | 8,9    | 10,14   | 23,25    | 6    | 9,12 | 14,15 |          |
| Balkees Abderrahman | MCF-7-5C    | X    | 10     | 11      | 11,12   | 14     | 30     | 16,17   | 12     | 8,9    | 10,14   | 23,25    | 6    | 9,12 | 14,15 |          |
| Balkees Abderrahman | MCF-7-ATCC  | X    | 10     | 11      | 11,12   | 14     | 30     | 16      | 11,12  | 8,9    | 10,14   | 23,25    | 6    | 9,12 | 14,15 |          |
| Balkees Abderrahman | MCF-7-LCCC1 | X    | 10     | 11      | 11,12   | 14     | 30     | 16      | 11,12  | 8,9    | 10,14   | 23,25    | 6    | 9,12 | 14,15 |          |
| Balkees Abderrahman | MCF-7-LCCC2 | X    | 10     | 11      | 11,12   | 14     | 29,30  | 16      | 12     | 8,9    | 10,14   | 23,25    | 6    | 9,12 | 14,15 |          |
| Balkees Abderrahman | MCF7-LCCC9  | X    | 10     | 11      | 11,12   | 14     | 30     | 16      | 12     | 8,9    | 10,14   | 23,25    | 6    | 9,12 | 14,15 |          |
| Balkees Abderrahman | MCF-7-PF    | X    | 10     | 11      | 11,12   | 14     | 30     | 16,17   | 12     | 8,9    | 10,14   | 23,25    | 6    | 9,12 | 14,15 |          |
| Balkees Abderrahman | MCF-7-RAL   | X    | 10     | 11      | 11,12   | 14     | 30     | 16      | 12     | 8,9    | 10,14   | 23,24,25 | 6    | 9,12 | 14,15 |          |
| Balkees Abderrahman | MCF-7-WS8   | X    | 10     | 11      | 11,12   | 14     | 30     | 16      | 12     | 8,9    | 10,14   | 23,25    | 6    | 9,12 | 15    |          |
| Public database NCI | MCF7        | X    | 10     | 11      | 11,12   | 14     | 30     | 16      | 11,12  | 8,9    | 10,14   | 23,25    | 6    | 9,12 | 14,15 | MATCH    |

| Source               | Sample Name | AMEL | CSF1PO | D13S317 | D16S539 | D18S51 | D21S11  | D3S1358 | D5S818 | D7S820 | D8S1179 | FGA   | TH01 | TPOX | vWA   | Comments |
|----------------------|-------------|------|--------|---------|---------|--------|---------|---------|--------|--------|---------|-------|------|------|-------|----------|
| Balkees Abderrahman  | BT474       | X    | 10,11  | 11      | 9,11    | 13,18  | 28,32,2 | 17      | 11,13  | 9,12   | 10,12   | 22,25 | 7    | 8    | 15,16 |          |
| Public database ATCC | BT474       | X    | 10,11  | 11      | 9,11    | 13,18  | 28,32,2 | 17      | 11,13  | 9,12   | 10,12   | 22,25 | 7    | 8    | 15,16 | MATCH    |

| Source              | Sample Name | AMEL | CSF1PO | D13S317 | D16S539 | D18S51 | D21S11 | D3S1358 | D5S818 | D7S820 | D8S1179 | FGA | TH01 | TPOX | vWA | Comments |
|---------------------|-------------|------|--------|---------|---------|--------|--------|---------|--------|--------|---------|-----|------|------|-----|----------|
| Balkees Abderrahman | T47D-A18    | X    | 11     | 12      | 10      | 17     | 28,31  | 15,17   | 12     | 11     | 13      | 23  | 6    | 11   | 14  |          |
| Public database NCI | T47D        | X    | 11,13  | 12      | 10      | 17     | 28,31  | 15,17   | 12     | 11     | 13      | 23  | 6    | 11   | 14  | MATCH    |

| Source               | Sample Name | AMEL | CSF1PO | D13S317 | D16S539 | D18S51 | D21S11 | D3S1358 | D5S818 | D7S820 | D8S1179 | FGA   | TH01  | TPOX | vWA   | Comments            |
|----------------------|-------------|------|--------|---------|---------|--------|--------|---------|--------|--------|---------|-------|-------|------|-------|---------------------|
| Balkees Abderrahman  | ZR-75-1     | X    | 10,11  | 9       | 11      | 13,14  | 31     | 15,16   | 13     | 10,11  | 11,13   | 20,22 | 7,9,3 | 8    |       | signal a little low |
| Public database ATCC | ZR75-1      | X    | 10,11  | 9       | 11,12   | 13,14  | 31     | 15,16   | 13     | 10     | 11,13   | 20,22 | 7,9,3 | 8    | 16,18 | MATCH               |
